# Supplementary material
Source: PubMed Central journal article supplement (PMC9037576)

Extended Data Fig. 1h

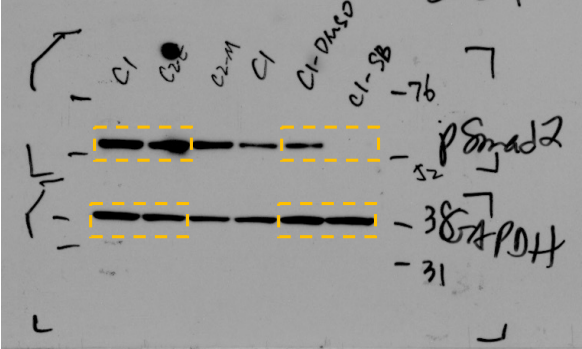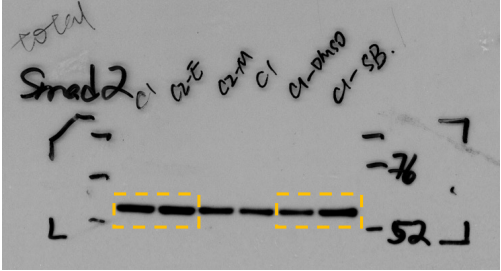

Supplement: NIHMS1783730-supplement-Source_Data_Extended_Data_Fig1h_original_gels.pdf [file NIHMS1783730-supplement-Source_Data_Extended_Data_Fig1h_original_gels.pdf]

Extended Data Fig. 3h

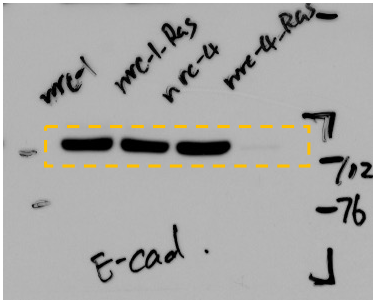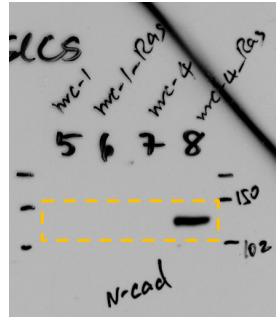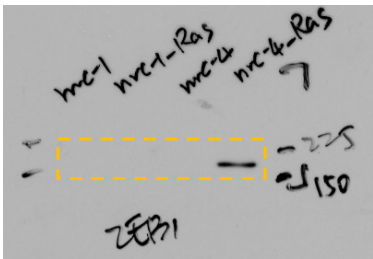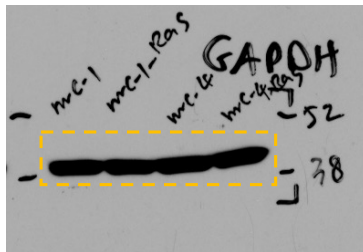

Supplement: NIHMS1783730-supplement-Source_Data_Extended_Data_Fig3h_original_gels.pdf [file NIHMS1783730-supplement-Source_Data_Extended_Data_Fig3h_original_gels.pdf]

Extended Data Fig. 4b

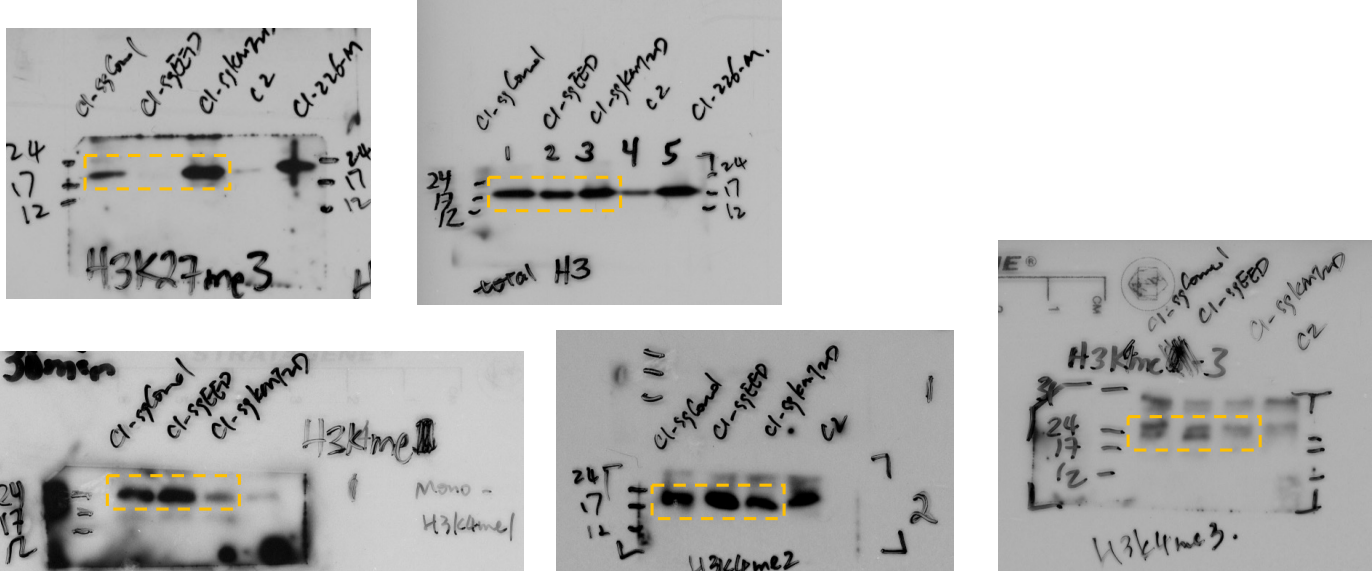

Supplement: NIHMS1783730-supplement-Source_Data_Extended_Data_Fig4b_original_gels.pdf [file NIHMS1783730-supplement-Source_Data_Extended_Data_Fig4b_original_gels.pdf]

Extended Data Fig. 5b

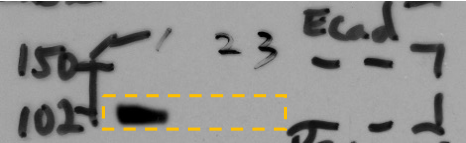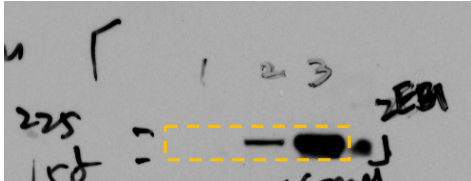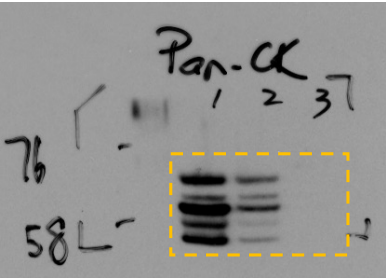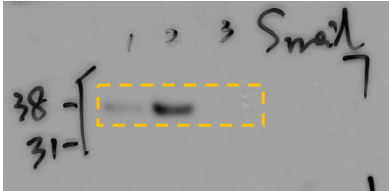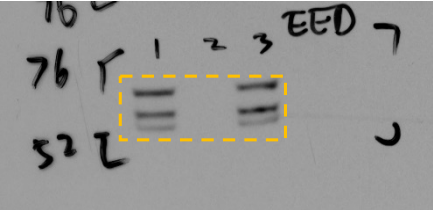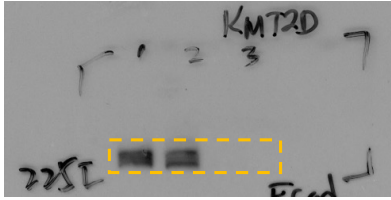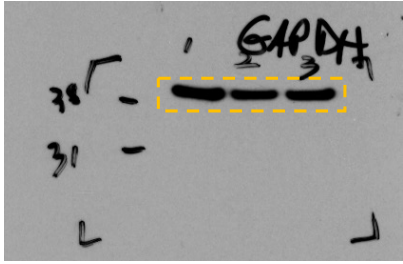

- 1. 149D2-sgControl
- 2. 149D2-sgEED-Mes
- 3. 149D2-sgKMT2D-Mes

Supplement: NIHMS1783730-supplement-Source_Data_Extended_Data_Fig5b_original_gels.pdf [file NIHMS1783730-supplement-Source_Data_Extended_Data_Fig5b_original_gels.pdf]

Extended Data Fig. 8b

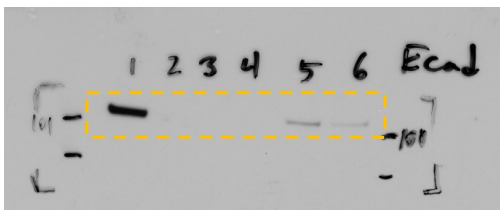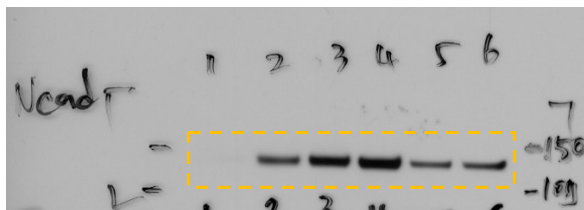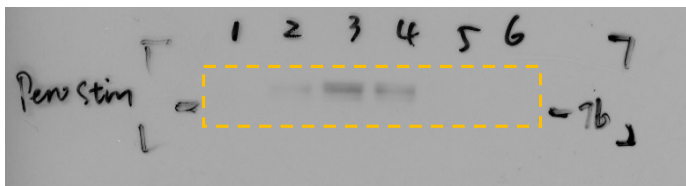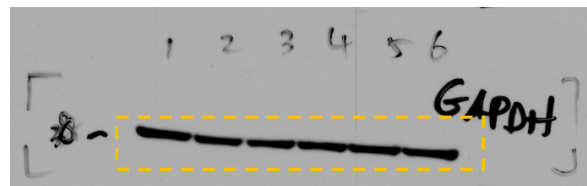

1. MCF10A\_DMSO
2. MCF10A\_TGF $\beta$
3. MCF10A\_TGF $\beta$ +EED226
4. MCF10A\_TGF $\beta$ +TAZ
5. MCF10A\_EED226
6. MCF10A\_TAZ

Supplement: NIHMS1783730-supplement-Source_Data_Extended_Data_Fig8b_original_gels.pdf [file NIHMS1783730-supplement-Source_Data_Extended_Data_Fig8b_original_gels.pdf]

Fig. 1c

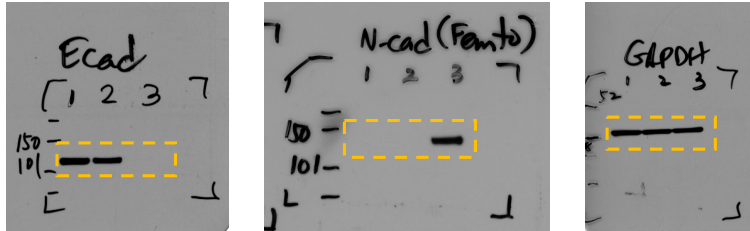

1. C1
2. C2-Epi
3. C2-Mes

Supplement: NIHMS1783730-supplement-Source_Data_Fig_1c_original_gels.pdf [file NIHMS1783730-supplement-Source_Data_Fig_1c_original_gels.pdf]

Fig. 3g

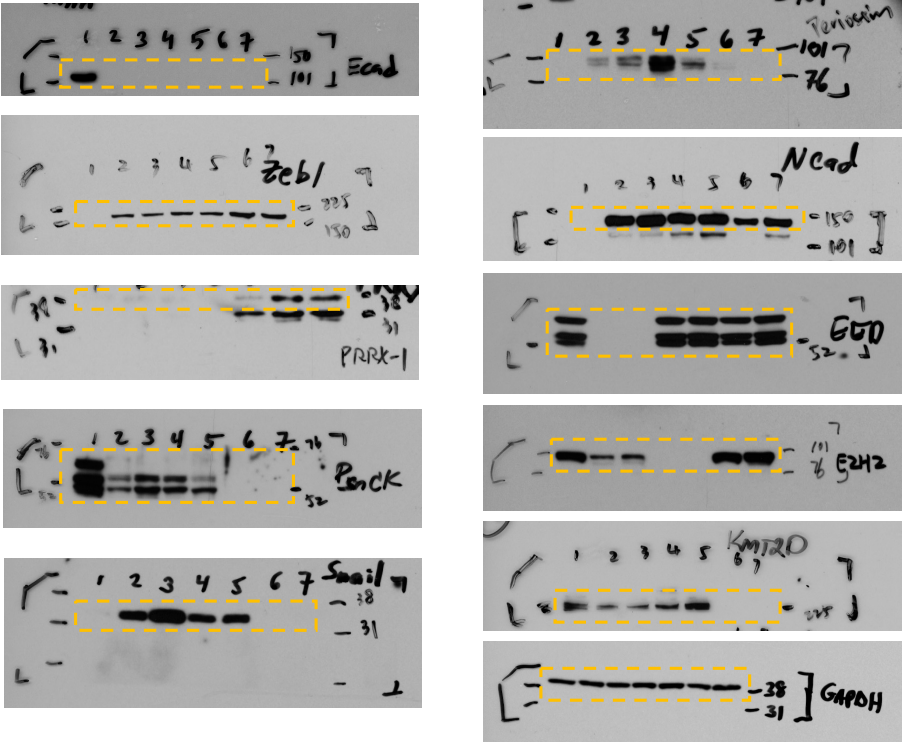

- 1. C1-sgControl
- 2. C1-sgEED-Mes
- 3. C1-sgEED(2)-Mes
- 4. C1-sgEZH2-Mes
- 5. C1-sgEZH2(2)-Mes
- 6. C1-sgKMT2D-Mes
- 7. C1-sgKMT2D(2)-Mes

Supplement: NIHMS1783730-supplement-Source_Data_Fig_3g_original_gels.pdf [file NIHMS1783730-supplement-Source_Data_Fig_3g_original_gels.pdf]

Fig. 6c

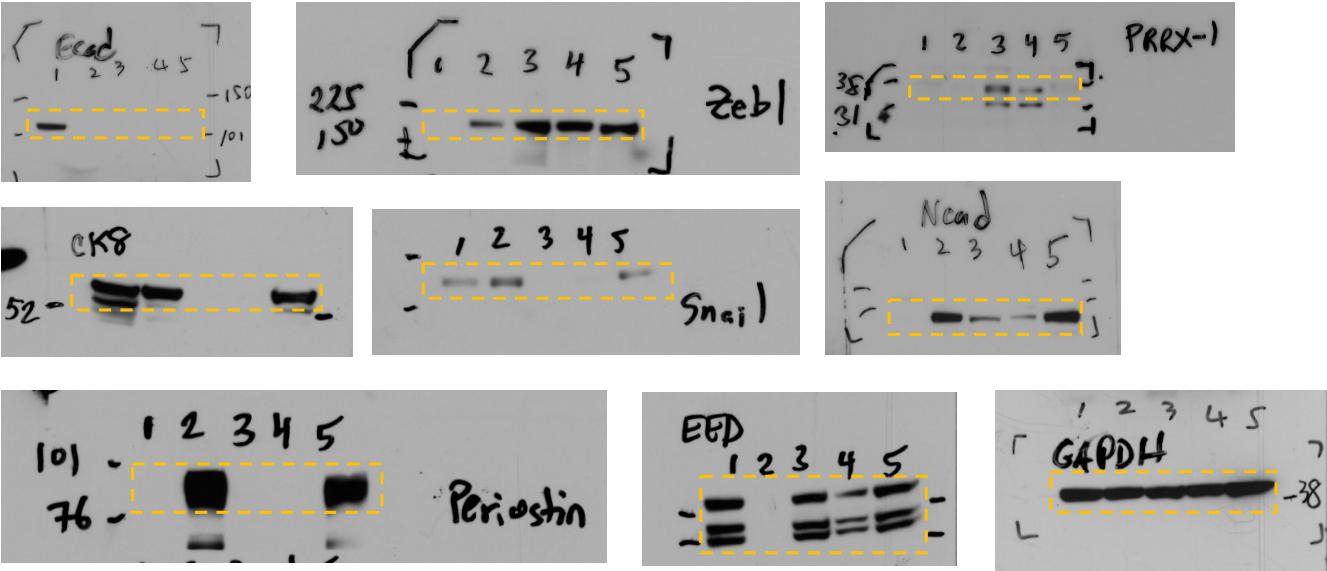

- 1. C1-sgControl
- 2. C1-sgEED-Mes
- 3. C1-sgKMT2D-Mes
- 4. C2-Mes
- 5. C1-226-Mes

Supplement: NIHMS1783730-supplement-Source_Data_Fig_6c_original_gels.pdf [file NIHMS1783730-supplement-Source_Data_Fig_6c_original_gels.pdf]
